# Supplementary material
Source: PubMed Central journal article supplement (PMC3374033)
Supplement: NIHMS377314-supplement-01.pdf [file NIHMS377314-supplement-01.pdf]

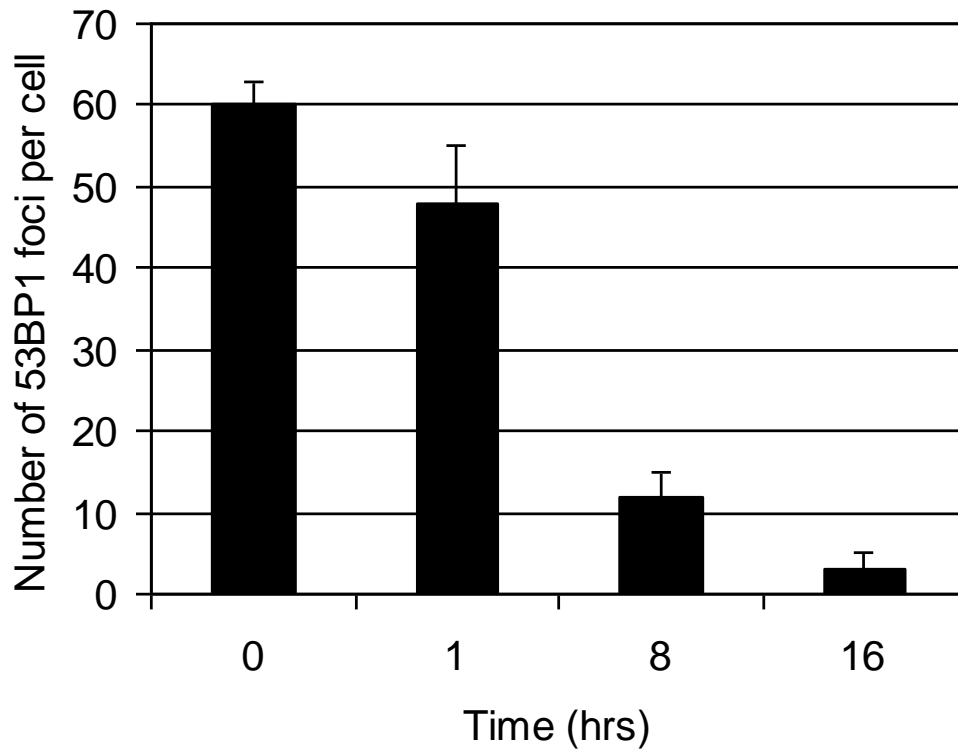

**Supplementary Figure 1**

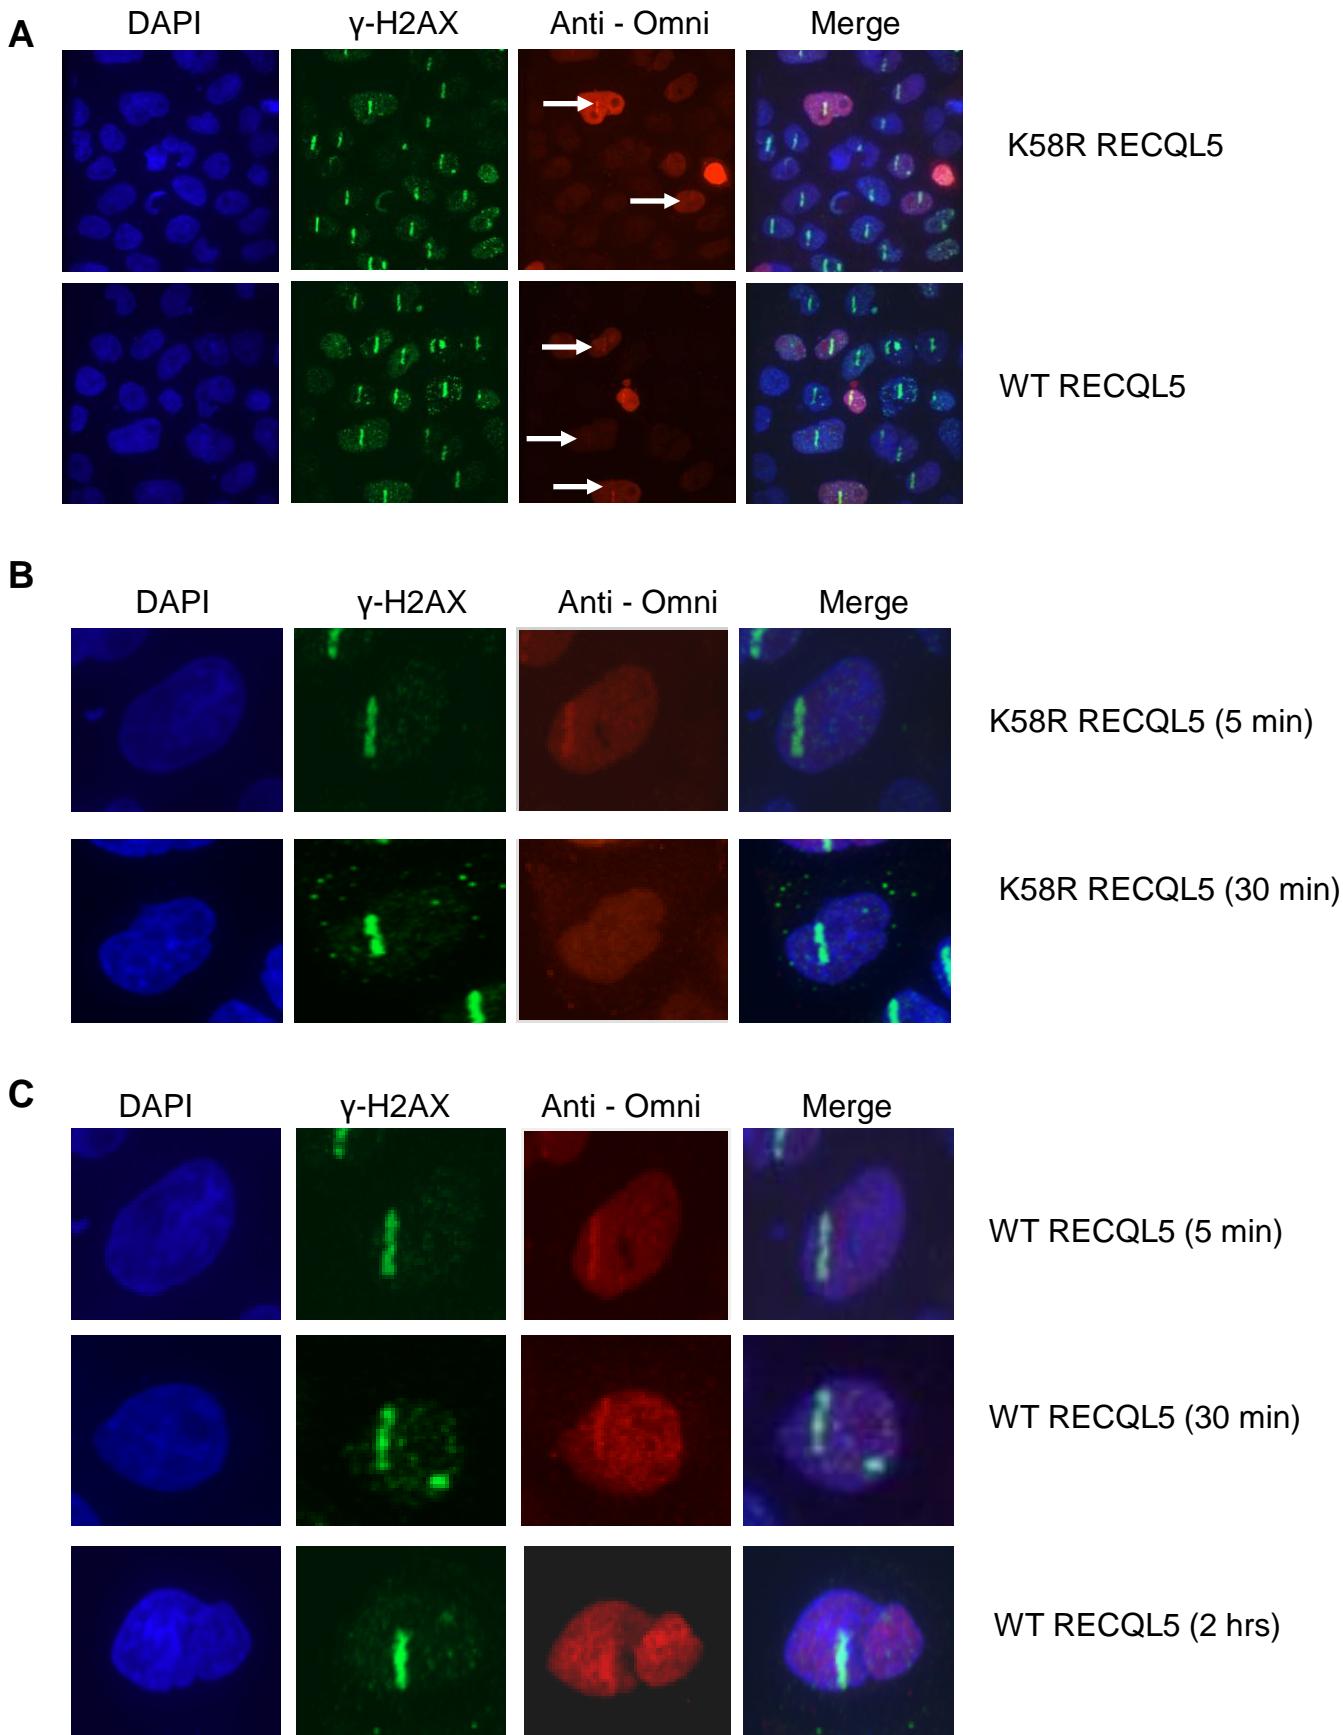

**Supplementary Figure 2**
